1 **Doberman pinschers present autoimmunity associated with functional autoantibodies:**  
2 **a model to study the autoimmune background of human dilated cardiomyopathy**

3

4 Gerhard Wess<sup>1</sup>, Gerd Wallukat<sup>2</sup>, Anna Fritscher<sup>1</sup>, Niels-Peter Becker<sup>2</sup>, Katrin Wenzel<sup>2</sup>,  
5 Johannes Müller<sup>2</sup>, Ingolf Schimke<sup>2\*</sup>,

6

7 <sup>1</sup> Clinic of Small Animal Medicine, Ludwig-Maximilians-Universität München; Germany

8 <sup>2</sup> Berlin Cures GmbH, Berlin, Germany

9

10 \*Corresponding author: Dr. Ingolf Schimke, Berlin Cures GmbH, Knesebeckstraße 59-61,  
11 10117 Berlin, Germany; [schimke@berlincures.de](mailto:schimke@berlincures.de)

12

13 **Keywords:** anti-beta1-adrenergic receptor autoantibodies, Doberman cardiomyopathy,  
14 functional autoantibodies, human dilated cardiomyopathy, anti-muscarinic receptor 2  
15 autoantibodies

16

17 **Short title:** Doberman cardiomyopathy for modeling human immune-mediated dilated  
18 cardiomyopathy

19

20 **Potential conflict of interest:**

21 The authors declare that the study was not funded by any public, commercial or private funds.  
22 Gerd Wallukat, Niels-Peter Becker, Katrin Wenzel, Johannes Müller and Ingolf Schimke as  
23 employees and shareholder (GW, JM, IS) of Berlin Cures GmbH declare that Berlin Cures  
24 GmbH only provided support in the form of salaries and research materials but did not have  
25 any additional role in the study design, data collection, analysis and statistical evaluation,  
26 decision to publish or preparation of the manuscript. Anna Fritscher and Gerhard Wess declare  
27 that they have no conflict of interest.

28

29 Berlin Cures GmbH, a spin-off company, founded in September 2014 for the commercial exploitation of  
30 patents held by Charité – Universitätsmedizin Berlin and Max-Delbrück-Center Berlin, Germany.

31 **Abstract**

32 **Background**

33 Autoimmunity associated with autoantibodies directed against the  $\beta$ 1-adrenergic receptor ( $\beta$ 1-  
34 AAB) is increasingly accepted as driving human dilated cardiomyopathy (DCM). Unfortunately,  
35 animal models of DCM are lacking, preventing our knowledge about  $\beta$ 1-AAB autoimmunity in  
36 DCM from being extended and hindering the development of related treatment strategies.

37 **Objectives**

38 To introduce an animal model, we studied Doberman pinschers, which develop  
39 cardiomyopathy (DoCM), with similarities to human DCM, with regard to their  $\beta$ 1-AAB  
40 autoimmunity.

41 **Methods**

42 Eighty-seven DP with DoCM and 31 (at enrolment) healthy controls were analyzed for  $\beta$ 1-AAB;  
43 the receptor binding site and sensitivity to inhibition were determined. In controls who  
44 developed cardiomyopathy during the follow-up,  $\beta$ 1-AAB were analyzed during the DoCM  
45 progress.

46 **Results**

47 Fifty-nine (67.8%) DoCM dogs and 19 (61.3%) controls were  $\beta$ 1-AAB positive. Excluding the  
48 9 controls who developed DoCM in the follow-up,  $\beta$ 1-AAB positivity tended to be more  
49 pronounced in DoCM.

50 From the controls who developed DoCM, 8 were  $\beta$ 1-AAB positive ( $p=0.044$  vs. dogs remaining  
51 healthy); their  $\beta$ 1-AAB level increased with the cardiomyopathy progress. Overall mortality and  
52 mortality exclusively due to cardiac reasons during the study period, were higher ( $p=0.002$ ;  
53  $p=0.037$ ) in  $\beta$ 1-AAB positive dogs. The dogs'  $\beta$ 1-AAB targeted a specific epitope centralized  
54 on the second extracellular receptor and were sensitive to inhibition by drugs already  
55 successful tested for the corresponding human autoantibody.

56 **Conclusions**

57 Doberman pinschers presented  $\beta$ 1-AAB associated autoimmunity similar to that driving the  
58 pathogenesis of human DCM. Consequently, DP could remove the lack of animal models  
59 available for studying  $\beta$ 1-AAB autoimmunity in DCM.

## 60 **Introduction**

61 Autoimmunity is increasingly accepted as the origin or amplifier of heart failure (1). For  
62 cardiomyopathies, preferentially for dilated cardiomyopathy (DCM) with idiopathic nature (as  
63 recently for the US re-calculated prevalence of 1 in 250-400 individuals (2)) and that  
64 secondarily to non-ischemic causes, e.g. infectious diseases such as myocarditis, several  
65 autoantibodies directed against cardiac antigens were discussed for breaking self-tolerance,  
66 leading to autoimmunity causing or supporting the disease pathogenesis (3). Among the  
67 autoantibodies, there are “classic” ones which induce immune responses, resulting in the  
68 destruction of affected tissues, whereby autoantibodies directed against contractile elements  
69 such as anti-myosin and anti-troponin autoantibodies are particularly important (4,5).

70 Starting in the 1970s, the classic autoantibodies were supplemented by an additional class of  
71 autoantibodies that bind to G-protein coupled receptors (GPCR-AAB). After receptor binding,  
72 GPCR-AAB, in the majority of cases, agonistically activate their related receptors in a similar  
73 way to the physiological agonists; therefore GPCR-AAB were called “functional  
74 autoantibodies”. However, mechanisms for the prevention of over-boarding receptor  
75 stimulation such as receptor down-regulation and desensitization, which are well known with  
76 physiological agonists, are lacking for GPCR-AAB. Consequently, GPCR-AAB are discussed  
77 as disease drivers as repeatedly summarized in (6-9).

78 With the finding of GPCR-AAB such as directed against the  $\beta$ 1-adrenergic receptor ( $\beta$ 1-AAB)  
79 and muscarinic receptor 2 (M2-AAB) (10,11) in patients with DCM of non-ischemic reasons,  
80 an autoimmune background of specifically associated with GPCR-AAB emerged. In contrast,  
81 patients with ischemic cardiomyopathy and healthy individuals carry GPCR-AAB only in very  
82 small amounts or these are completely absent (9).

83 GPCR-AAB directed against the  $\beta$ 1-adrenergic receptor are seen in 70–80% of patients with  
84 non-ischemic DCM (6-9).

85 In a distinct group of these patients, preferentially those suffering from arrhythmia, M2-AAB  
86 were additionally found with a prevalence of up to 40% (6). Among all heart specific classical  
87 and functional autoantibodies, however, the strongest pathogenicity has been demonstrated

88 related to human DCM for  $\beta$ 1-AAB, so that they are increasingly accepted as pathogenic  
89 drivers and treatment targets, as summarized in (6-9).

90 Three lines of investigation have proposed the concept of  $\beta$ 1-AAB dependent autoimmunity in  
91 the pathogenesis of human DCM; first, experiments using myocardial cells to demonstrate the  
92 cardio-pathogenic effects of  $\beta$ 1-AAB at the cellular and subcellular levels; second, animal  
93 experiments where rodents were immunized for  $\beta$ 1-AAB generation to demonstrate their  
94 cardio-pathogenic effects; and third, and most impressive, clinical trials demonstrating the  
95 benefit to DCM patients when specifically their  $\beta$ 1-AAB were removed by immunoadsorption  
96 (IA) (12,13). This treatment option is now increasingly accepted for DCM patients positive for  
97  $\beta$ 1-AAB. However, to overcome the problems of IA resulting from costs, logistics and patient  
98 burden, drug-associated treatment concepts for the *in vivo* neutralization of  $\beta$ 1-AAB come  
99 increasingly to the fore (14,15). Unfortunately, to manifest and extend the knowledge about  
100 functional autoantibodies in human DCM in general and specifically of  $\beta$ 1-AAB and even more  
101 to prove related treatment concepts in pre-clinical studies, there is a lack of animal models that  
102 are more related to human DCM than the rather artificial rodent immunization models (16,17).  
103 Although, there are also rodent models with naturally occurring DCM and transgenic mouse  
104 lines that were engineered for cardiomyopathy development. There are even mice crossed  
105 from transgenic and knockout ones which develop a “so-called” autoimmune cardiomyopathy  
106 (18,19). However, there is currently no evidence that such rodents may be suitable to eliminate  
107 the lack of models for analyzing the pathogenic role of functional autoantibody associated  
108 autoimmunity in human DCM and specifically the role of  $\beta$ 1-AAB and M2-AAB as a driver and  
109 treatment target.

110 What's more, *“rodents are phylogenetically very distant from human and some*  
111 *pathophysiological features of diseases and their response to pharmacological treatment may*  
112 *not be reliable predictors”* (18). Consequently, *“for research aimed at clinical translation, it is*  
113 *imperative that initial results from small rodent studies be confirmed in a large animal model*  
114 *that more closely resembles humans ...”* (18) and there is “... a simple rule, the closer the  
115 heart or body weight of the animal to human heart and body, the more similar are the hearts”

116 (18). Among the large animals that can be used as models for human DCM, Doberman  
117 Pinscher (DP) should be of great interest due to their frequent development of dilated  
118 cardiomyopathy (DoCM) (20), which has many similarities with human DCM (21-25).  
119 DoCM is characterized by three stages. DP in stage one are presumed to have genetic  
120 mutations which lead to myocardial alteration on a subcellular level but the majority of cellular  
121 changes that occur is still unknown (26,27). However, affected heart mitochondrial protein  
122 expression, increased oxidative stress and evidence for apoptosis have been evidenced (28).  
123 In this stage, approximately corresponding to NYHA class 1 of human heart failure, the heart  
124 is electrically and morphologically normal (23,29). Dogs in state two (occult stage) (NYHA class  
125 2) have either ventricular premature complexes (VPC) or a systolic dysfunction, or both, in the  
126 absence of overt clinical signs. Dogs in stage three (NYHA class 3/4) present with typical signs  
127 very similar as found in human heart failure, such as congestive heart failure (CHF),  
128 arrhythmia, syncope and exercise intolerance (20).  
129 Here, we demonstrate for the first time that DP frequently carry  $\beta$ 1-AAB that could act as a  
130 pathogenic driver in the pathogenesis of cardiomyopathy in a similar way to  $\beta$ 1-AAB in human  
131 DCM. Therefore, we suggest that DP could be a suitable model for basic investigation to  
132 determine the relationship between  $\beta$ 1-AAB-associated autoimmunity and cardiomyopathy,  
133 and even more importantly, to prove treatment concepts to counteract  $\beta$ 1-AAB *in vivo*.

134

## 135 **Materials and Methods**

136 The study was conducted in accordance with the German animal welfare law. The study  
137 protocol was approved by the "Regierung von Oberbayern". DP were enrolled based on owner  
138 study agreement.

139

## 140 **Animals**

141 Client-owned purebred DP attending the Cardiology Department of "Medizinische  
142 Kleintierklinik, Ludwig-Maximilians-Universität München" for routine check-up, cardiomyopathy  
143 diagnostics or cardiomyopathy follow-up were analyzed for  $\beta$ 1-AAB and M2-AAB.

144 Based on owner study agreement a total of 118 DP (male: n=60; 50.8%, female: n=58; 49.2%)  
145 between 1 and 13 years old (median 6 years) were enrolled. To identify DoCM, Holter-ECG  
146 was performed for the detection of arrhythmia and echocardiography to evidence cardiac  
147 dysfunction. In parallel, blood was sampled for the measurement of functional autoantibodies.  
148 Based on the guidelines of the European Society of Veterinary Cardiology (30), DoCM was  
149 diagnosed for dogs with >300 VPC/24h or two subsequent examinations within a year showing  
150 between 50 and 300 VPC/24h (31) and echocardiographic indicative for cardiac dysfunction.  
151 For that purpose, the left ventricular end-systolic (ESVI) and end-diastolic volume (EDVI) were  
152 measured and indexed to body surface area based on Simpson's method. An ESVI of >55  
153 ml/m<sup>2</sup> or/and EDVI of >95 ml<sup>2</sup> were considered to be indicative of DCM.

154

155 ***Measurement of autoantibodies directed against the  $\beta$ 1-adrenergic receptor ( $\beta$ 1-AAB)***  
156 ***and muscarinic receptor 2 (M2-AAB)***

157 To measure  $\beta$ -AAB and M2-AAB, a bioassay established by Wallukat and Wollenberger was  
158 used (11), which was modified and standardized as described in (32). In this bioassay, the  
159 chronotropic response of spontaneously beating cultured neonatal rat cardiomyocytes to the  
160 IgG prepared from the dogs' serum was recorded (1 unit of  $\beta$ 1-AAB activity = 1 beat/min  
161 frequency change; lower limit of detection (LLD) = 4.0 U;  $\beta$ 1-AAB positivity =  $\geq$  8.0 U). Through  
162 the use of specific blockers of the  $\beta$ 1-adrenergic (bisoprolol) and muscarinic receptor 2  
163 (atropine), the cells' chronotropic response can be attributed to  $\beta$ 1-AAB or M2-AAB. For  
164 comprehensive information about sample (IgG) preparation, bioassay test setup and  
165 measurement procedure of GPCR-AAB, see (6,33).

166

167 ***Localization of the receptor binding site with their specific epitope targeted by the***  
168 ***autoantibodies directed against the  $\beta$ 1-adrenergic receptor ( $\beta$ 1-AAB) and muscarinic***  
169 ***receptor 2 (M2-AAB)***

170 To localize the extracellular binding site (loops), 50  $\mu$ l of the autoantibody containing IgG  
171 preparation was pre-incubated for 30 min with 2  $\mu$ l of solutions containing synthetic peptides



172 (50  $\mu\text{mol/l}$ ) (Biosyntan GmbH, Berlin-Buch, Germany) which represent the first and second  
173 extracellular loops of the  $\beta$ 1-adrenergic and muscarinic receptor 2. Then, this mixture was  
174 added to the bioassay for measurement of the autoantibodies' chronotropic activities. To  
175 exclusively localize the extracellular binding site of  $\beta$ 1-AAB, the bioassay was performed in the  
176 presence of 1 $\mu\text{mol/l}$  atropine to block the M2-AAB activity if present in the IgG preparation. To  
177 exclusively localize the target of M2-AAB, the bioassay was performed in the presence of  
178 1 $\mu\text{mol/l}$  bisoprolol to block  $\beta$ 1-AAB activity. A comparable procedure was used to map the  
179 specific epitope on the receptor loop targeted by the  $\beta$ 1-AAB and M2-AAB. In this case, the  
180 bioassay was performed after the pre-treatment of GPCR-AAB containing IgG with an excess  
181 of synthetic peptides (Biosyntan GmbH, Berlin-Buch, Germany), which overlapped to  
182 represent the amino acid sequence of the receptor loop; first described for  $\beta$ 1-AAB in (34). For  
183 mapping of the  $\beta$ 1-AAB targeted epitope on the second extracellular receptor, peptides were  
184 used, as follows: P1: HWWRAE, P2: RAESDE, P3: ARRCYND, P4: PKCCDF, and P5:  
185 DFVTNR; for M2-AAB epitope mapping: P1: VRTED, P2: EDGECY, P3: CYIQFF, P4: FFSNAA  
186 P5: AAVTFG. For this, 50  $\mu\text{l}$  of the GPCR-AAB-containing IgG preparation was pre-incubated  
187 for 30 min with 2  $\mu\text{l}$  of solutions containing the synthetic peptides (100  $\mu\text{mol/l}$ ) (Biosyntan  
188 GmbH, Berlin-Buch, Germany). Then, this mixture was added to the Bioassay for GPCR-AAB  
189 measurement. In the case of finding the  $\beta$ 1-AAB epitope, the activity was measured as  
190 described above in the presence of atropine; for M2-AAB, the bioassay was performed in the  
191 presence of bisoprolol.

192

193 ***In vitro indication for the ability to neutralize Doberman pinscher autoantibodies***  
194 ***directed against the  $\beta$ 1-adrenergic receptor and muscarinic receptor 2 by drugs***  
195 ***already successfully tested in animal and clinical studies for the neutralization of***  
196 ***human autoantibodies directed against the  $\beta$ 1-adrenergic receptor***

197 For this purpose, the chronotropic activity of  $\beta$ 1-AAB containing IgG from DP was monitored  
198 in the bioassay after pre-incubation of the IgG with drugs that have already been successfully  
199 tested in animal and clinical studies for  $\beta$ -AAB inhibition. We tested here a peptide which

200 mimics the amino acid sequence of the second extracellular loop of the  $\beta$ 1-adrenergic receptor  
201 (D1) and was synthesized at our request by Biosyntan GmbH, Berlin-Buch, Germany. This  
202 peptide acts comparable to the second loop mimics COR-1 which was already studied to  
203 counteract  $\beta$ 1-AAB in patients with DCM (14). The other two substances are aptamers (15,35):  
204 the first (aptamer 110; D2) is able to neutralize only  $\beta$ 1-AAB due to specific  $\beta$ 1-AAB binding,  
205 which was demonstrated *in vitro* and in an animal study (36,37), while the second (BC 007;  
206 D3), as demonstrated in animal and human studies, is able to inhibit several GPCR-AAB,  
207 including  $\beta$ 1-AAB and M2-AAB (38,39). After drug pre-incubation of  $\beta$ 1-AAB or M2AAB  
208 containing IgG from DP with the drugs (test concentration 1  $\mu$ mol/l), the mixture was added to  
209 the bioassay for measurement of the chronotropic activity of IgG.

210

## 211 **Statistics**

212 Undetectable marker concentrations (<lower limit of detection, LLD) were numerically  
213 expressed as values representing one-half of the LLD. Statistical analysis was performed using  
214 the SPSS software package (SPSS Inc., Chicago, US) with Pearson chi-square test and  
215 Fisher's exact tests for the comparison of binary variables. For the intergroup comparison of  
216 continuous data, the Kruskal-Wallis H-test combined with the Mann-Whitney U-test for post-  
217 hoc analysis for the intra-individual comparison of continuous data, and the Friedman test  
218 combined with Wilcoxon test for post-hoc analysis was employed.

219 For the graphical representation of continuous patient data, box plots indicate the median and  
220 interquartile range (IQR; 25th and 75th percentiles), while whiskers with ends represent the  
221 largest and smallest values inside 1.5 times the IQR, outliers (open circles) representing values  
222 between 1.5 and 3 times the IQR, and extremes (stars) placed more than 3 times the IQR.

223

## 224 **Results**

### 225 ***Basic characteristics***

226 Among the study cohort of 118 DP as presented in Table 1, 87 (73.7%) dogs suffered from  
227 DoCM which was in age and gender composition comparable to the control group. The

228 cardiomyopathy group consisted of dogs exclusively demonstrating arrhythmias (n=17; 19.5%  
229 - VPC/24h: median 205, min 1, max 6465; twice VPC/24 within one year: 286/173/385; EDVI:  
230 76.45/55/91, ESVI: 40.51/22/54) indicated as the DoCM-VPC group, with exclusively  
231 echocardiographic measures outside of the reference intervals (DoCM-ECHO, n=27; 31.0% -  
232 VPC/24h: 5/0/1521; twice VPC/24 within one year: 211/0/1521; EDVI: 107.4/87/196; ESVI:  
233 66.24/50/164) as well as those dogs presenting with arrhythmias and echocardiographic  
234 pathologies in combination (DoCM-VPC/ECHO, n=43; 49.5% - VPC/24h: 700/0/15 000; twice  
235 VPC/24 within one year: 279/124/380; ESVI: 106.8/91/160; EDVI: 67.35/42/106). The groups  
236 did not differ significantly in age. In terms of gender composition, the groups DoCM-ECHO,  
237 DoCM-VPC/ECHO and the control group are comparable, whereas in the group DoCM-ECHO  
238 female animals predominate, especially compared to the group DoCM-ECHO (p>0.05). All  
239 dogs were in the pre-clinical, occult stage of the disease. Dogs presenting with severe systemic  
240 diseases, end-stage heart failure or non-DCM cardiac diseases were excluded.  
241 The group of dogs (n=31; 26.3% of the total number - VPC/24h: 2/0/97; twice VPC/24 within  
242 one year: 184/0/279; EDVI: 77.8/53/95; ESVI: 39.3/25/55) which did not fulfill these criteria for  
243 DoCM were defined as the primary control group (C). Related to the diagnostic criteria of  
244 DoCM used in our study, the control group was composed of healthy animals and those DP at  
245 stage 1 of DoCM. At study enrolment, 9 dogs (T0: median age 3 years; min 2, max 3 years)  
246 classified into the control group developed cardiomyopathy during the follow-up, diagnosed  
247 primarily by VPC detection (T1: median age of 7 years; min 5, max 9 years); they progressed  
248 to a diagnosis by the detection of VPCs combined with pathological echocardiography (T2:  
249 median age 9 years; min 5, max 9 years).

250

251 ***Autoantibodies directed against the  $\beta$ 1-adrenergic and muscarinic receptor 2 in***  
252 ***Doberman pinschers at the time of enrolment***

253 As indicated in Table 1, 78 (66.1%) of the dogs in the total study cohort presented with  $\beta$ 1-  
254 AAB values outside of the reference range  $\geq 8$  U/min, which means that the dogs were positive  
255 for  $\beta$ 1-AAB. Seven dogs also presented with pathological M2-AAB values, and were all also

256  $\beta$ 1-AAB positive. The rest (n=40; 33.9%) presented with  $\beta$ 1-AAB values in the reference range  
257 (< 8U/min). The dogs were sub-divided into those with DoCM and those without signs of DoCM  
258 (control group) at enrolment; however, 59 (67.8%) of the dogs with DoCM and 19 (61.3%) of  
259 the control group were positive for  $\beta$ 1-AAB. Among the  $\beta$ 1-AAB positive dogs, 5 of the DoCM  
260 group and 2 of the control group were also positive for M2-AAB. The remaining 28 (32.2%) in  
261 the DoCM group and 12 (38.7%) in the control group were  $\beta$ 1-AAB negative and negative for  
262 M2-AAB. Both positivity for  $\beta$ 1-AAB and negativity, respectively, were not significantly different  
263 between the groups. However, the median  $\beta$ 1-AAB activity was 19.32 U/min in the DoCM  
264 group, which was slightly higher than the 16 U/min reported in the control group.

265 Among the control group, there were 9 dogs, 8 which were positive for  $\beta$ 1-AAB, who developed  
266 DoCM in the follow-up. Excluding these dogs from the control group, the statistical evaluation  
267 presented a trend (p=0.097) to more  $\beta$ 1-AAB positivity in the DoCM group compared with the  
268 control group. When reassembling the DoCM group by supplementing it with the 9 animals  
269 developing cardiomyopathy in the follow-up, the tendency (p=0.066) towards more  
270 pronounced  $\beta$ 1-AAB positivity in the DoCM group became more marked.

271 Concerning the different DoCM groups, there were no significant differences related to the  
272  $\beta$ 1-AAB positivity (DoCM-VPC: n=12, 70.6%; DoCM-Echo: n=15, 55.6%; DoCM-VPC /Echo:  
273 n=32, 74.4%).

274 **Table 1**

275 **Basic characteristics and serum activities of autoantibodies directed against the  $\beta$ 1-**  
 276 **adrenergic and muscarinic receptor 2 (\* p<0.05; \*\* p<0.01)**

277

| Basic characteristics                                                   |         | Autoantibody presence (n/%) |         |              |          |
|-------------------------------------------------------------------------|---------|-----------------------------|---------|--------------|----------|
|                                                                         |         | $\beta$ 1-AAB (n/%)         |         | M2-AAB (n/%) |          |
|                                                                         |         | (+)                         | (-)     | (+)          | (-)      |
| <b>Total study cohort (n)</b>                                           | 118     | 78/66.1                     | 40/33.9 | 7/5.9        | 111/94.1 |
| <b>Age (years; median/min/max)</b>                                      | 6/1/13  |                             |         |              |          |
| <b>Male (n/%)</b>                                                       | 60/50.8 |                             |         |              |          |
| <b>Female (n/%)</b>                                                     | 58/49.2 |                             |         |              |          |
| <b>Survivor (n/%)</b>                                                   | 59/50.0 | 31/52.5                     | 28/47.5 | 5/8.5        | 54/91.5  |
| <b>Non-survivor (n/%)</b>                                               | 54/45.8 | 43/79.6**                   | 11/20.4 | 2/3.7        | 52/96.3  |
| <b>Lost of follow up (n/%)</b>                                          | 5/4.2   |                             |         |              |          |
| <b>Non-survivor (cardiac reason) (n/%)</b>                              | 35/29.7 | 26/74.3*                    | 9/25.7  | 0/0          | 35/100   |
| <b>Non-survivor (non-cardiac reason) (n/%)</b>                          | 19/16.1 | 17/89.5*                    | 2/10.5  | 2/10.5       | 17/89.5  |
| <b>Doberman cardiomyopathy total (n/%)</b>                              | 87/73.7 | 59/67.8                     | 28/32.2 | 5/5.7        | 83/94.3  |
| <b>Age (years; median/min/max)</b>                                      | 7/2/11  |                             |         |              |          |
| <b>Male (n/%)</b>                                                       | 46/52.8 |                             |         |              |          |
| <b>Female (n/%)</b>                                                     | 41/47.2 |                             |         |              |          |
| <b>Arrhythmia exclusively (n/%)</b>                                     | 17/19.5 | 12/70.6                     | 5/29.4  | 1/5.9        | 16/94.1  |
| <b>Diagnostic criteria</b>                                              |         |                             |         |              |          |
| <i>VPC/24h &gt;300 or Twice 50-300 VPC/24 within one year</i>           |         |                             |         |              |          |
| <b>Age (years; median/min/max)</b>                                      | 6/2/10  |                             |         |              |          |
| <b>Male (n/%)</b>                                                       | 13/76.5 |                             |         |              |          |
| <b>Female (n/%)</b>                                                     | 4/23.5  |                             |         |              |          |
| <b>Medication (n/%)</b>                                                 |         |                             |         |              |          |
| <i>No treatment</i>                                                     | 5/29.4  |                             |         |              |          |
| <i>Beta-blocker</i>                                                     | 2/11.8  |                             |         |              |          |
| <i>Antiarrhythmic drug</i>                                              | 2/11.8  |                             |         |              |          |
| <i>Antiarrhythmic drug + ACE Inhibitor</i>                              | 8/47.0  |                             |         |              |          |
| <b>Echocardiographic pathologies (n/%)</b>                              | 27/31.0 | 15/56.6                     | 12/44.4 | 0/0          | 27/100   |
| <b>Diagnostic criteria</b>                                              |         |                             |         |              |          |
| <i>ESVI of &gt;55 ml/m<sup>2</sup> or EDVI of &gt;95 ml<sup>2</sup></i> |         |                             |         |              |          |
| <b>Age (years; median/min/max)</b>                                      | 8/3/11  |                             |         |              |          |
| <b>Male (n/%)</b>                                                       | 8/29.6  |                             |         |              |          |

|                                                                                         |         |         |         |       |         |
|-----------------------------------------------------------------------------------------|---------|---------|---------|-------|---------|
| <b>Female (n/%)</b>                                                                     | 19/70.4 |         |         |       |         |
| <b>Medication (n/%)</b>                                                                 |         |         |         |       |         |
| No treatment                                                                            | 2/7.5   |         |         |       |         |
| Calcium sensitizer/PDE 3 inhibitor                                                      | 12/44.5 |         |         |       |         |
| Calcium sensitizer/PDE 3 Inhibitor + ACE Inhibitor                                      | 13/48.0 |         |         |       |         |
| <b>Arrhythmia + echocardiographic pathologies</b>                                       | 43/49.5 | 32/74.4 | 11/25.6 | 4/9.3 | 39/90.7 |
| <b>Diagnostic criteria</b>                                                              |         |         |         |       |         |
| VPC/24h >300 or Twice 50-300 VPC/24 within one year                                     |         |         |         |       |         |
| ESVI of >55 ml/m <sup>2</sup> or EDVI of >95 ml <sup>2</sup>                            |         |         |         |       |         |
| <b>Age (years; median/min/max)</b>                                                      | 7/2/10  |         |         |       |         |
| <b>Male (n/%)</b>                                                                       | 20/46.5 |         |         |       |         |
| <b>Female (n/%)</b>                                                                     | 23/53.5 |         |         |       |         |
| <b>Medication (n/%)</b>                                                                 |         |         |         |       |         |
| No treatment                                                                            | 1/2.5   |         |         |       |         |
| Calcium sensitizer/PDE 3 inhibitor                                                      | 1/2.5   |         |         |       |         |
| Calcium sensitizer/PDE 3 inhibitor + ACE inhibitor                                      | 16/37.2 |         |         |       |         |
| Calcium sensitizer/PDE 3 inhibitor + ACE inhibitor + beta-blocker                       | 8/18.6  |         |         |       |         |
| Calcium sensitizer/PDE 3 inhibitor + ACE inhibitor + beta-blocker + Antiarrhythmic drug | 13/30.2 |         |         |       |         |
| ACE inhibitor + Antiarrhythmic drug + ACE inhibitor + beta-blocker                      | 2/4.6   |         |         |       |         |
| ACE inhibitor + Antiarrhythmic drug + ACE inhibitor + beta-blocker                      | 2/4.6   |         |         |       |         |
| <b>Heathy control group (n/%)</b>                                                       | 31/26.3 | 19/61.3 | 12/38.7 | 2/6.5 | 29/93.5 |
| <b>Diagnostic criteria</b>                                                              | 6/1/13  |         |         |       |         |
| <b>Age (years; median/min/max)</b>                                                      | 17/54.8 |         |         |       |         |
| <b>Male (n/%)</b>                                                                       | 14/45.2 |         |         |       |         |
| <b>Female (n/%)</b>                                                                     |         |         |         |       |         |

279 ***Follow-up of autoantibodies directed against the  $\beta$ 1-adrenergic receptor in primary***  
280 ***healthy dogs who progress to cardiomyopathy***

281 Among the 9 dogs which were healthy at the time of enrolment (DoCM T0) but progressed to  
282 DoCM, one of these animals was negative for  $\beta$ 1-AAB at enrolment and remained negative  
283 despite progressing to DoCM diagnosed by VPC (DoCM T1) and later than by VPC combined  
284 with pathologic echocardiography (DoCM T2). The other 8 dogs were  $\beta$ 1-AAB positive at  
285 enrolment. In parallel to the cardiomyopathy development, the  $\beta$ 1-AAB levels increased from  
286 T0 to T1 in all DP ( $p<0.05$ ) and in  $\beta$ 1-AAB positive DP at study enrolment ( $p<0.02$ ), from T1  
287 to T2 in all DP (n.s) and in  $\beta$ 1-AAB positive DP at study enrolment ( $p<0.02$ ), as well as from  
288 T0 to T2 in all DP ( $p<0.05$ ), and in  $\beta$ 1-AAB positive DP at study enrolment ( $p<0.02$ ). A further  
289 rise in  $\beta$ 1-AAB from T1 to T2 was demonstrated for seven DP. In the one dog that showed a  
290 decrease in the  $\beta$ 1-AAB level from T1 to T2, the  $\beta$ 1-AAB level remained clearly in the  
291 pathological range (Figure 1).

292 In the comparison of dogs who were free of DoCM for the whole study period with those without  
293 the signs of DoCM at enrolment but who progressed to DoCM, a significantly higher proportion  
294 of  $\beta$ 1-AAB positivity ( $p=0.044$ ) was calculated for the last animals.

295

296 **Figure 1**

297 **(A) Activity of autoantibodies directed against the  $\beta$ 1-adrenergic receptor and (B) left**  
298 **ventricular end-systolic (ESVI), and end-diastolic volume (EDVI) indexed to body**  
299 **surface area and ventricular premature contractions per 24 hours (VPC/24h) in**  
300 **primarily healthy Doberman pinschers (DP) (n=9) during the development of severe**  
301 **cardiomyopathy (DoCM T0 = healthy; DoCM T1 = cardiomyopathy indicated by arrhythmia;**  
302 **DoCM T2 = cardiomyopathy indicated by arrhythmia combined with pathological**  
303 **echocardiography); (A) § T1 vs. T0:  $p<0.05$  in all DP,  $p<0.02$  in  $\beta$ 1-AAB positive DP at study**  
304 **enrolment; & T2 vs. T1:  $p<0.02$  in  $\beta$ 1-AAB positive DP at study enrolment; # T2 vs. T0:**  
305  **$p<0.05$  in all DP,  $p<0.02$  in  $\beta$ 1-AAB positive DP at study enrolment; (B) § T1 vs. T0:  $p<0.01$**



306 (VPC724h), & T2 vs. T1:  $p < 0.02$  (VPC/24h),  $p < 0.01$  (EDVI, ESVI), # T2 vs. T0:  $p < 0.02$   
307 (VPC724h, EDVI),  $p < 0.01$  (ESVI).

308

309 ***Mortality of Doberman pinschers related to autoantibodies directed against the  $\beta$ 1-***  
310 ***adrenergic receptor***

311 Related to the 118 dogs enrolled, 59 (50%) survived the study period, 35 (29.7%) died due to  
312 cardiac reason such as sudden death ( $n=30$ ; 85.7%) or heart failure ( $n=5$ ; 14.3%) and 19  
313 (16.1%) died from non-cardiac reasons (Table 1). The median survival time of dogs related to  
314 the time of enrolment was 1 year (min 0, max 9 years). Five (4.2%) dogs were lost to follow-  
315 up. Of the surviving dogs, 28 (47.5%) were  $\beta$ 1-AAB negative at study enrolment and 31  
316 (52.5%) were  $\beta$ 1-AAB positive. In contrast, only 11 (20.4%) of the non-survivors were  $\beta$ 1-AAB  
317 negative while 43 (79.6%) were positive for  $\beta$ 1-AAB, which documents a significantly higher  
318 prevalence ( $p < 0.01$ ; odd ratio 3.61 (1.57-8.33) of  $\beta$ 1-AAB positivity in the non-survivors.

319 The increased prevalence of  $\beta$ 1-AAB in the non-survivors concerned the dogs that specifically  
320 died due to cardiac reasons ( $n=9$ ; 25.7%  $\beta$ 1-AAB negative vs.  $n=26$  (74.3%)  $\beta$ 1-AAB positive;  
321  $p < 0.05$ ; odds ratio 2.61 (1.05-6.51) but also those died due to non-cardiac reasons ( $p < 0.05$ ;  
322 odds ratio 7.93 (1.68-37.49). With respect to M2-AAB, 54 (91.5%) of the surviving dogs were  
323 negative at study enrolment and 5 (5.7%) were positive. However, M2-AAB positivity did  
324 significantly increase the risk for death.

325

326 ***Characteristic features of autoantibodies directed against  $\beta$ 1-adrenergic and***  
327 ***muscarinic receptor 2 present in Doberman pinschers***

328 As exemplarily demonstrated for  $\beta$ 1-AAB in Figures 2 and 3, both  $\beta$ 1-AAB and M2-AAB found  
329 in DP targeted the second extracellular loops of the related receptors. With respect to the  
330 epitope on the second extracellular loops which were targeted, the  $\beta$ 1-AAB epitope is located  
331 more centrally and contains 3 cysteine residues while the M2-AAB epitope is located closer to  
332 the N-terminus and is only flanked by 1 cysteine.

333



334 **Figure 2**

335 **Autoantibodies directed against the  $\beta$ 1-adrenergic receptor ( $\beta$ 1-AAB) of Doberman**

336 **pinschers (n=6) target the second extracellular receptor loop.** Using the bioassay of

337 spontaneously beating cultured neonatal rat cardiomyocytes, the chronotropic activities of

338 the Doberman pinschers'  $\beta$ 1-AAB is demonstrated by the absence or presence of the

339 peptides (L1 = first loop; L2 = second) competing with the first and second extracellular

340 receptor loops. The control experiment was performed in the presence of bisoprolol (BISO).

341 Values below the low limit of detection (LLD) were displayed as half range values. LLD = 4

342 beats/min; cut off (separating healthy from disease subjects) = 8 beats per/min.

343

344 **Figure 3**

345 **Mapping of the second extracellular loop of the  $\beta$ 1-adrenergic receptor for epitope**

346 **localization targeted by the related autoantibodies ( $\beta$ 1-AAB) of Doberman pinschers**

347 Using the bioassay of spontaneously beating cultured neonatal rat cardiomyocytes, the  $\beta$ 1-

348 AAB (n = 5) were measured in the absence or presence of competing peptides that

349 overlapped to represent the second extracellular receptor (P1: HWWRAE, P2: RAESDE, P3:

350 ARRCYND, P4: PKCCDF, and P5: DFVTNR). Values below the low limit of detection (LLD)

351 were displayed as half range values. LLD = - 4 beats/min; cut off (separating healthy from

352 disease subjects) = - 8 beats per/min.

353

354 Based on bioassay measurements, Figure 4 demonstrates that all three drugs which were

355 successful for the neutralization of  $\beta$ 1-AAB in human with DCM were also able to neutralize

356 DP  $\beta$ 1-AAB. Compared with the original  $\beta$ 1-AAB containing DP IgG, the same IgG pre-

357 incubated with the drugs did not present any chronotropic activity on spontaneously beating

358 neonatal cardiomyocytes.

359

360 **Figure 4**

361 **In vitro indication for the ability to neutralize Doberman pinscher autoantibodies**  
362 **directed against the  $\beta$ 1-adrenergic receptor by drugs documented to neutralize human**  
363 **autoantibodies directed against the  $\beta$ 1-adrenergic receptor.** Using the bioassay of  
364 spontaneously beating cultured neonatal rat cardiomyocytes, the  $\beta$ 1-AAB were measured in  
365 the absence (control n=8) or presence of the drugs (D1 = second loop peptide (n=4), D2 =  
366 aptamer 110 (n=2), D3 = aptamer BC 007 (n=4)). Values below the low limit of detection  
367 (LLD) were displayed as half range values. LLD = - 4 beats/min; cut off (separating healthy  
368 from disease subjects) = - 8 beats per/min.

369

## 370 **Discussion**

371 Dilated cardiomyopathy with a disease cumulative prevalence of 58% (20,30,40,41) is the most  
372 common form of cardiomyopathy in Doberman pinschers which "... closely resembles the  
373 human form of the disease" (24) and therefore repeatedly suggested for modeling human DCM  
374 (18,30). In the final state, as mentioned already in above, DP with DoCM present with typical  
375 signs such as congestive heart failure (CHF), arrhythmia, syncope and exercise intolerance  
376 very similar as found in human heart failure. From anatomical and morphological points of  
377 view, left ventricular chamber dilatation and fibrotic cardiac rearrangement were seen (20).  
378 The majority of dogs (93.5%) do not survive 2 years after being diagnosed with DoCM (42),  
379 which is in agreement with our findings. Despite optimal treatment, the survival of the dogs is  
380 about 130 days (median) after entering the overt stage (43).

381 Almost 30 years ago, Smucker et al. (25) suggested that DP should be used as a model for  
382 human DCM. Subsequently, DP with dilated cardiomyopathy were announced as "...  
383 *remain(ing) (an) untapped resources to investigate both mechanisms of arrhythmias and*  
384 *pharmacodynamics of anti-arrhythmics*" (21).

385 However, DP as a DCM model did not gain widespread acceptance in basic research and also  
386 not in pre-clinical studies for the testing of human drugs.

387 For the pathogenesis of DoCM, a genetic background is discussed and a autosomal dominant  
388 inheritance was proposed (41) but it has been stated (30) that "... *absence of a (specific)*

389 *genetic mutation ... associated with ... DoCM ... does not ensure the dog will never ... develop*  
390 *DCM ... (and) ... identification of a genetic mutation does not guarantee the dog will ... develop*  
391 *DCM*". Comparable to the genetic background discussed for DoCM, genetic reasons are also  
392 assumed to be prominent in human DCM (44). A familial disease history was found in 25% of  
393 the human DCM patients (45) detected by a highly diverse genetic background with several  
394 gene mutations that, nevertheless, produces a relatively unique DCM phenotype (2).  
395 For this complexity in the pathogenesis of DoCM and human DCM, consequently, further  
396 causes such as the phenomenon of autoimmunity against the heart must be considered  
397 whereby it is currently beyond any doubt that autoimmunity is in tight relation to the individuals'  
398 genetic backgrounds. (46). Today, it is increasingly accepted that autoimmunity is as an  
399 important pathogenic driver of human DCM (47) and functional autoantibodies such as  $\beta$ 1-  
400 AAB and M2-AAB diseases came to the fore (6-9). Finding a comparable autoimmunity in  
401 DoCM, additionally to all the other similarities of DoCM with human DCM summarized (21-25),  
402 would Doberman pinchers predestinate as model to investigate the autoimmune background  
403 of human DCM in general and specifically treatment strategies directed to the functional  
404 autoantibodies. We present here for the first time data which indicate that the autoimmune  
405 background associated preferentially with  $\beta$ 1-AAB and discussed as driver of human DCM  
406 also probably drive the pathogenesis of DoCM.  
407 In our study cohort, DP with DoCM showed a prevalence of  $\beta$ 1-AAB of about 70%, comparable  
408 as is in human DCM (6). Furthermore, non-surviving dogs were significantly more often positive  
409 for  $\beta$ 1-AAB than survivors, which clearly agrees the findings with patients with human DCM  
410 studies (48-50).  
411 Interestingly, the dogs of our control group also carried  $\beta$ 1-AAB (about 60%). Whether the  $\beta$ -  
412 AAB positive dogs are those dogs being genetically compromised for DoCM and therefore in  
413 stage one of DoCM remains speculative as it remains whether these dogs are those who  
414 progress to the clinically overt DoCM. However, 60 % of  $\beta$ 1-AAB positivity in the control group  
415 corresponds to the documented DoCM prevalence (20). Additionally, there was a significantly  
416 higher frequency of  $\beta$ 1-AAB positivity in the healthy dogs who developed DoCM during the

417 study period which could support the assumption of  $\beta$ 1-AAB dependent driving to clinically  
418 relevant DoCM. Related to humans, we discussed the role of  $\beta$ 1-AAB autoimmunity in  
419 progressing to cardiomyopathy for Chagas' patients, where 30% of asymptomatic patients  
420 were positive for  $\beta$ 1-AAB and, based on epidemiologic data, nearly 30% of asymptomatic  
421 Chagas' patients also progress to Chagas' cardiomyopathy (32). Taking all of this together, we  
422 assume a prominent driving role for  $\beta$ 1-AAB associated autoimmunity in the pathogenesis of  
423 DoCM, as is increasingly being accepted for human DCM. The resembled role of  $\beta$ 1-AAB  
424 autoimmunity in the pathogenesis of DoCM and human DCM, for humans again deduced from  
425 Chagas' patient data, was also supported by the increase in the  $\beta$ 1-AAB level from healthy or  
426 asymptomatic subjects to those suffering from mild to severe cardiomyopathy, which was seen  
427 in both Doberman pinschers and Chagas' patients (32). Consequently, measurement of  $\beta$ 1-  
428 AAB could be potentially used for monitoring and prognosis of DoCM and Chagas'  
429 cardiomyopathy. Unfortunately, corresponding longitudinal studies focused directly on patients  
430 developing DCM are still lacking, but we hope that bio-banking concepts will facilitate the  
431 access of such data in the near future.

432 If we take a look at the characteristics of dog and human  $\beta$ 1-AAB, some further analogies were  
433 obvious.  $\beta$ 1-AAB of Doberman pinschers target the second extracellular receptor loop, where  
434 there is an epitope localized centrally and containing a cysteine between amino acids 193 and  
435 204 which is comparable with the epitope targeted by  $\beta$ 1-AAB found in DCM patients (34,51);  
436 however, it must be stated that there are additional  $\beta$ 1-AAB in human DCM which target the  
437 first extracellular receptor loop (34) which have not been seen in Doberman pinschers.  
438 However,  $\beta$ 1-AAB directed against the second extracellular receptor loop were sometimes (52)  
439 but not always (34) accused of being the determining cause of DCM.

440 As for  $\beta$ 1-AAB of DCM patients described in (14,37,39), the  $\beta$ 1-AAB activity of Doberman  
441 pinschers could be inhibited by peptides which mimic the second extracellular receptor loop or  
442 by aptamers binding the autoantibodies. In our view, this is a further indicator that the  $\beta$ 1-AAB  
443 associated autoimmunity in Doberman pinschers and human is closely related. Although M2-

444 AAB were found with a clearly lower prevalence in DoCM than published for human DCM, the  
445 characteristics are comparable. M2-AAB targeted the second extracellular  
446 receptor loop which was also published for M2-AAB of human cardiomyopathies, such as DCM  
447 and Chagas' cardiomyopathy (53,54). The specific epitope is located closer to the N-terminus,  
448 between amino acids 169 and 177; the same region was also demonstrated for M2-AAB of  
449 patients with DCM (unpublished data) or Chagas' cardiomyopathy (54). Related to their  
450 specificity for  $\beta$ 1-AAB inhibition, the second loop peptide (D1) and aptamer 110 (D2) did not  
451 inhibit M2-AAB, but the aptamer BC 007 (D3), the so-called "broad-band neutralizer" of GPCR-  
452 AAB, inhibited the Doberman pinscher M2-AAB as seen for M2-AAB from DCM patients  
453 (39,55).

454 Consequently, we suggest, to take the information about functional autoantibody associated  
455 autoimmunity in DoCM, together with all the other similarities of DoCM with human DCM as  
456 summarized in (21-25), to re-activate Doberman pinschers as a model of human DCM,  
457 specifically for basic investigation of the functional autoantibody associated autoimmunity in  
458 human DCM and still more importantly for pre-clinical studies in the development of treatment  
459 strategies directed against functional autoantibody associated autoimmunity.

460 From our point of view, this is all the more important since, firstly, none of the small animal  
461 models used for the modelling of human DCM to date develop functional autoantibodies and,  
462 secondly, the functional autoantibodies found in the immunization models seem, based on  
463 ELISA experiments (56) to differ from the human autoantibodies in quality and quantity.

464 We agree that a large animal model such as the DP is a priori cost-intensive and there are  
465 strong requirements based on "World Medical Statement on Animal Use in Biomedical  
466 Research" to respect the welfare of animals in general and specifically of large animals such  
467 as DP used for research. However, a study design such as used for the present study with  
468 enrolment of client-owned purebred DP attending a veterinary-medical institution for routine  
469 check-up, disease diagnostics or follow-up would strongly minimize the cost and guarantee  
470 the DP's welfare. In addition, the DP of our study came from different breeding populations  
471 throughout Europe and therefore has a greater genetic diversity than the DP from one litter or

472 only a few and can therefore better reflect the pathogenic situation in human DCM with its  
473 already mentioned very different genetic background.

474 Last but not least, we have learned that dog owners have a great willingness to participate with  
475 their dogs in studies that test new treatment options, especially if it is expected that the  
476 treatments can also be beneficial to their dog; always provided that a study design is chosen  
477 that guarantees a minimal physiological and psychological impairment of the animals, which  
478 was ensured in our study by non-invasive heart examination and only blood analysis.

479

### 480 **Study limitations**

481 Based on the diagnostic criteria for DoCM used in our study, the control group consisted of  
482 healthy animals and DP at stage 1 of DoCM. It is assumed that the dogs at this stage exhibit  
483 genetic mutations that lead to myocardial alteration at the subcellular level without becoming  
484 electrically or echocardiographically visible. We suspected that the  $\beta$ 1-AAB-positive DP of the  
485 control group were those at level 1 of the DoCM. In the future, a detailed characterization of  
486 the DP with respect to a genetic predisposition is necessary to verify this speculation.

487

### 488 **Conclusions**

489 Doberman pinschers with cardiomyopathy presented with typical signs for autoimmunity,  
490 preferentially with autoimmunity associated with autoantibodies directed against G-protein  
491 coupled receptors, which is closely related to the autoimmunity found in patients with DCM.  
492 This, together with the higher prevalence of cardiomyopathy in Doberman pinschers, the fast  
493 disease progression and reaching the primary end point of death within around 4 months of  
494 entering the severe stage of cardiomyopathy, presents an excellent basis to re-activate  
495 Doberman pinschers as a model to study the basics of human DCM. This is specifically the  
496 case for GPCR-AAB associated autoimmunity as a disease cause and as a model for pre-  
497 clinical studies in drug development aimed at counteracting this form of autoimmunity and  
498 consequently DCM.

499

## 500 **References**

- 501 1. Satta N, Vuilleumier N. Auto-antibodies as possible markers and mediators of  
502 ischemic, dilated, and rhythmic cardiopathies. *Curr Drug Targets* 2015;16:342-60.
- 503 2. Hershberger RE, Hedges DJ, Morales A. Dilated cardiomyopathy: the complexity of a  
504 diverse genetic architecture. *Nat Rev Cardiol* 2013;10:531-47.
- 505 3. Caforio AL, Marcolongo R, Jahns R, Fu M, Felix SB, Iliceto S. Immune-mediated and  
506 autoimmune myocarditis: clinical presentation, diagnosis and management. *Heart Fail*  
507 *Rev* 2013;18:715-32.
- 508 4. Nussinovitch U, Shoenfeld Y. Anti-troponin autoantibodies and the cardiovascular  
509 system. *Heart* 2010;96:1518-24.
- 510 5. Nussinovitch U, Shoenfeld Y. The diagnostic and clinical significance of anti-  
511 muscarinic receptor autoantibodies. *Clin Rev Allergy Immunol* 2012;42:298-308.
- 512 6. Bornholz B, Wallukat G, Roggenbuck D, Schimke I. Chapter 3 - Autoantibodies  
513 Directed Against G-Protein-Coupled Receptors in Cardiovascular Diseases: Basics  
514 and Diagnostics. In: Nussinovitch U, editor *The Heart in Rheumatic, Autoimmune and*  
515 *Inflammatory Diseases*: Academic Press, 2017:49-63.
- 516 7. Müller J, Wallukat G, Schimke I. Chapter 27 - Autoantibody-Directed Therapy in  
517 Cardiovascular Diseases. In: Nussinovitch U, editor *The Heart in Rheumatic,*  
518 *Autoimmune and Inflammatory Diseases*: Academic Press, 2017:659-679.
- 519 8. Becker NP, Goettel P, Mueller J, Wallukat G, Schimke I. Functional autoantibody  
520 diseases: Basics and treatment related to cardiomyopathies. *Frontiers In Bioscience*  
521 2019;Landmark:14-14.
- 522 9. Becker NP, Muller J, Gottel P, Wallukat G, Schimke I. Cardiomyopathy - An approach  
523 to the autoimmune background. *Autoimmun Rev* 2017;16:269-286.
- 524 10. Fu ML. Anti-M2 muscarinic receptor autoantibodies and idiopathic dilated  
525 cardiomyopathy. *Int J Cardiol* 1996;54:127-35.
- 526 11. Wallukat G, Wollenberger A. Effects of the serum gamma globulin fraction of patients  
527 with allergic asthma and dilated cardiomyopathy on chronotropic beta adrenoceptor



- 528 function in cultured neonatal rat heart myocytes. Biomed Biochim Acta 1987;46:S634-  
529 9.
- 530 12. Dandel M, Wallukat G, Englert A, Lehmkuhl HB, Knosalla C, Hetzer R. Long-term  
531 benefits of immunoadsorption in beta(1)-adrenoceptor autoantibody-positive  
532 transplant candidates with dilated cardiomyopathy. Eur J Heart Fail 2012;14:1374-88.
- 533 13. Wallukat G, Muller J, Hetzer R. Specific removal of beta1-adrenergic autoantibodies  
534 from patients with idiopathic dilated cardiomyopathy. N Engl J Med 2002;347:1806.
- 535 14. Jahns R, Jahns V, Lohse M, Palm D. MEANS FOR THE INHIBITION OF ANTI- ss1-  
536 ADRENERGIC RECEPTOR ANTIBODIES. Julius-Maximilians-Universitaet  
537 Wuerzburg, 2007.
- 538 15. Schimke I, Haberland A, Wallukat G. Use of Aptamers in Therapy and/or Diagnosis of  
539 Autoimmune Diseases. Charite - Universitaetsmedizin Berlin; Max-Delbrueck-  
540 Centrum Fuer Molekulare Medizin; Schimke, Ingolf; Haberland, Annkathrin;  
541 Wallukat, Gerd, 2012.
- 542 16. Jahns R, Boivin V, Hein L et al. Direct evidence for a beta 1-adrenergic receptor-  
543 directed autoimmune attack as a cause of idiopathic dilated cardiomyopathy. J Clin  
544 Invest 2004;113:1419-29.
- 545 17. Matsui S, Fu ML, Hayase M et al. Active immunization of combined beta1-  
546 adrenoceptor and M2-muscarinic receptor peptides induces cardiac hypertrophy in  
547 rabbits. J Card Fail 1999;5:246-54.
- 548 18. Camacho P, Fan H, Liu Z, He JQ. Small mammalian animal models of heart disease.  
549 Am J Cardiovasc Dis 2016;6:70-80.
- 550 19. Recchia FA, Lionetti V. Animal models of dilated cardiomyopathy for translational  
551 research. Vet Res Commun 2007;31 Suppl 1:35-41.
- 552 20. Wess G, Schulze A, Butz V et al. Prevalence of dilated cardiomyopathy in Doberman  
553 Pinschers in various age groups. J Vet Intern Med 2010;24:533-8.
- 554 21. Hamlin RL. Animal models of ventricular arrhythmias. Pharmacol Ther 2007;113:276-  
555 95.



- 556 22. Hensley MT, Tang J, Woodruff K et al. Intracoronary allogeneic cardiosphere-derived  
557 stem cells are safe for use in dogs with dilated cardiomyopathy. *J Cell Mol Med*  
558 2017;21:1503-1512.
- 559 23. O'Grady MR, O'Sullivan ML. Dilated cardiomyopathy: an update. *Vet Clin North Am*  
560 *Small Anim Pract* 2004;34:1187-207.
- 561 24. Petric AD, Stabej P, Zemva A. Dilated cardiomyopathy in Doberman Pinschers:  
562 Survival, Causes of Death and a Pedigree Review in a Related Line. *J Vet Cardiol*  
563 2002;4:17-24.
- 564 25. Smucker ML, Kaul S, Woodfield JA, Keith JC, Manning SA, Gascho JA. Naturally  
565 occurring cardiomyopathy in the Doberman pinscher: a possible large animal model  
566 of human cardiomyopathy? *J Am Coll Cardiol* 1990;16:200-6.
- 567 26. Mausberg TB, Wess G, Simak J et al. A locus on chromosome 5 is associated with  
568 dilated cardiomyopathy in Doberman Pinschers. *PLoS One* 2011;6:e20042.
- 569 27. Owczarek-Lipska M, Mausberg TB, Stephenson H, Dukes-McEwan J, Wess G, Leeb  
570 T. A 16-bp deletion in the canine PDK4 gene is not associated with dilated  
571 cardiomyopathy in a European cohort of Doberman Pinschers. *Anim Genet*  
572 2013;44:239.
- 573 28. Lopes R, Solter PF, Sisson DD, Oyama MA, Prosek R. Characterization of canine  
574 mitochondrial protein expression in natural and induced forms of idiopathic dilated  
575 cardiomyopathy. *Am J Vet Res* 2006;67:963-70.
- 576 29. Calvert CA, Meurs KM. Cardiomyopathy in Doberman Pinschers. In: Bonagura JD,  
577 Twedt DC, editors *Current veterinary therapy*: St. Louis: Saunders Elsevier,  
578 2009:800-803.
- 579 30. Wess G, Domenech O, Dukes-McEwan J, Haggstrom J, Gordon S. European Society  
580 of Veterinary Cardiology screening guidelines for dilated cardiomyopathy in  
581 Doberman Pinschers. *J Vet Cardiol* 2017;19:405-415.

- 582 31. Geraghty NK. Vergleich verschiedener Holterkriterien zur Diagnose des  
583 arrhythmischen Stadiums der dilatativen Kardiomyopathie beim Dobermann. Ludwig-  
584 Maximilians-Universität München, 2011.
- 585 32. Wallukat G, Munoz Saravia SG, Haberland A et al. Distinct patterns of autoantibodies  
586 against G-protein-coupled receptors in Chagas' cardiomyopathy and megacolon.  
587 Their potential impact for early risk assessment in asymptomatic Chagas' patients. J  
588 Am Coll Cardiol 2010;55:463-8.
- 589 33. Wallukat G, Pruss H, Muller J, Schimke I. Functional autoantibodies in patients with  
590 different forms of dementia. PLoS One 2018;13:e0192778.
- 591 34. Wallukat G, Wollenberger A, Morwinski R, Pitschner HF. Anti-beta 1-adrenoceptor  
592 autoantibodies with chronotropic activity from the serum of patients with dilated  
593 cardiomyopathy: mapping of epitopes in the first and second extracellular loops. J  
594 Mol Cell Cardiol 1995;27:397-406.
- 595 35. Schimke I, Haberland A, Kage A, Wallukat G, Dahmen C. Aptamers That Inhibit  
596 Interaction Between Antibody and 2nd Extracellular Loop of Human Beta-1-  
597 Adrenergic Receptor. Charite - Universitaetsmedizin Berlin; Max-Delbrueck-Centrum  
598 Fuer Molekulare Medizin; Aptares Ag; Schimke, Ingolf; Haberland, Annkathrin;  
599 Kage, Andreas; Wallukat, Gerd; Dahmen, Claudia, 2012.
- 600 36. Haberland A, Wallukat G, Berg S et al. Neutralization of pathogenic beta1-receptor  
601 autoantibodies by aptamers in vivo: the first successful proof of principle in  
602 spontaneously hypertensive rats. Mol Cell Biochem 2014;393:177-80.
- 603 37. Haberland A, Wallukat G, Dahmen C, Kage A, Schimke I. Aptamer neutralization of  
604 beta1-adrenoceptor autoantibodies isolated from patients with cardiomyopathies. Circ  
605 Res 2011;109:986-92.
- 606 38. Mueller J, Haberland A, Becker N-P et al. THE DNA-BASED THERAPEUTIC AGENT  
607 BC 007 COMPLETELY NEUTRALIZES AGONISTIC AUTOANTIBODIES DIRECTED  
608 AGAINST  $\beta$ 1-ADRENOCEPTORS: RESULTS OF A PHASE 1 TRIAL. Journal of the  
609 American College of Cardiology 2018;71:A645.

- 610 39. Wallukat G, Muller J, Haberland A et al. Aptamer BC007 for neutralization of  
611 pathogenic autoantibodies directed against G-protein coupled receptors: A vision of  
612 future treatment of patients with cardiomyopathies and positivity for those  
613 autoantibodies. *Atherosclerosis* 2016;244:44-7.
- 614 40. Calvert CA. Dilated congestive cardiomyopathy in doberman pinschers. *Comp Cont*  
615 *Educ Pract* 1986;8:417-430.
- 616 41. Meurs KM, Fox PR, Norgard M et al. A prospective genetic evaluation of familial  
617 dilated cardiomyopathy in the Doberman pinscher. *J Vet Intern Med* 2007;21:1016-  
618 20.
- 619 42. Tidholm A, Jonsson L. A retrospective study of canine dilated cardiomyopathy (189  
620 cases). *J Am Anim Hosp Assoc* 1997;33:544-50.
- 621 43. O'Grady MR, Minors SL, O'Sullivan ML, Horne R. Effect of pimobendan on case  
622 fatality rate in Doberman Pinschers with congestive heart failure caused by dilated  
623 cardiomyopathy. *J Vet Intern Med* 2008;22:897-904.
- 624 44. McNally EM, Golbus JR, Puckelwartz MJ. Genetic mutations and mechanisms in  
625 dilated cardiomyopathy. *J Clin Invest* 2013;123:19-26.
- 626 45. Charron P, Elliott PM, Gimeno JR et al. The Cardiomyopathy Registry of the  
627 EURObservational Research Programme of the European Society of Cardiology:  
628 baseline data and contemporary management of adult patients with  
629 cardiomyopathies. *Eur Heart J* 2018;39:1784-1793.
- 630 46. Wang L, Wang FS, Gershwin ME. Human autoimmune diseases: a comprehensive  
631 update. *J Intern Med* 2015;278:369-95.
- 632 47. Caforio AL, Tona F, Bottaro S et al. Clinical implications of anti-heart autoantibodies  
633 in myocarditis and dilated cardiomyopathy. *Autoimmunity* 2008;41:35-45.
- 634 48. Iwata M, Yoshikawa T, Baba A, Anzai T, Mitamura H, Ogawa S. Autoantibodies  
635 against the second extracellular loop of beta1-adrenergic receptors predict ventricular  
636 tachycardia and sudden death in patients with idiopathic dilated cardiomyopathy. *J*  
637 *Am Coll Cardiol* 2001;37:418-24.

- 638 49. Pei J, Li N, Chen J et al. The predictive values of beta1-adrenergic and M2  
639 muscarinic receptor autoantibodies for sudden cardiac death in patients with chronic  
640 heart failure. *Eur J Heart Fail* 2012;14:887-94.
- 641 50. Stork S, Boivin V, Horf R et al. Stimulating autoantibodies directed against the cardiac  
642 beta1-adrenergic receptor predict increased mortality in idiopathic cardiomyopathy.  
643 *Am Heart J* 2006;152:697-704.
- 644 51. Magnusson Y, Marullo S, Hoyer S et al. Mapping of a functional autoimmune epitope  
645 on the beta 1-adrenergic receptor in patients with idiopathic dilated cardiomyopathy. *J*  
646 *Clin Invest* 1990;86:1658-63.
- 647 52. Nikolaev VO, Boivin V, Stork S et al. A novel fluorescence method for the rapid  
648 detection of functional beta1-adrenergic receptor autoantibodies in heart failure. *J Am*  
649 *Coll Cardiol* 2007;50:423-31.
- 650 53. Fu LX, Magnusson Y, Bergh CH et al. Localization of a functional autoimmune  
651 epitope on the muscarinic acetylcholine receptor-2 in patients with idiopathic dilated  
652 cardiomyopathy. *J Clin Invest* 1993;91:1964-8.
- 653 54. Wallukat G, Nissen E, Morwinski R, Muller J. Autoantibodies against the beta- and  
654 muscarinic receptors in cardiomyopathy. *Herz* 2000;25:261-6.
- 655 55. Haberland A, Holtzhauer M, Schlichtiger A et al. Aptamer BC 007 - A broad spectrum  
656 neutralizer of pathogenic autoantibodies against G-protein-coupled receptors. *Eur J*  
657 *Pharmacol* 2016;789:37-45.
- 658 56. Wenzel K, Schulze-Rothe S, Muller J, Wallukat G, Haberland A. Difference between  
659 beta1-adrenoceptor autoantibodies of human and animal origin-Limitations detecting  
660 beta1-adrenoceptor autoantibodies using peptide based ELISA technology. *PLoS*  
661 *One* 2018;13:e0192615.

662

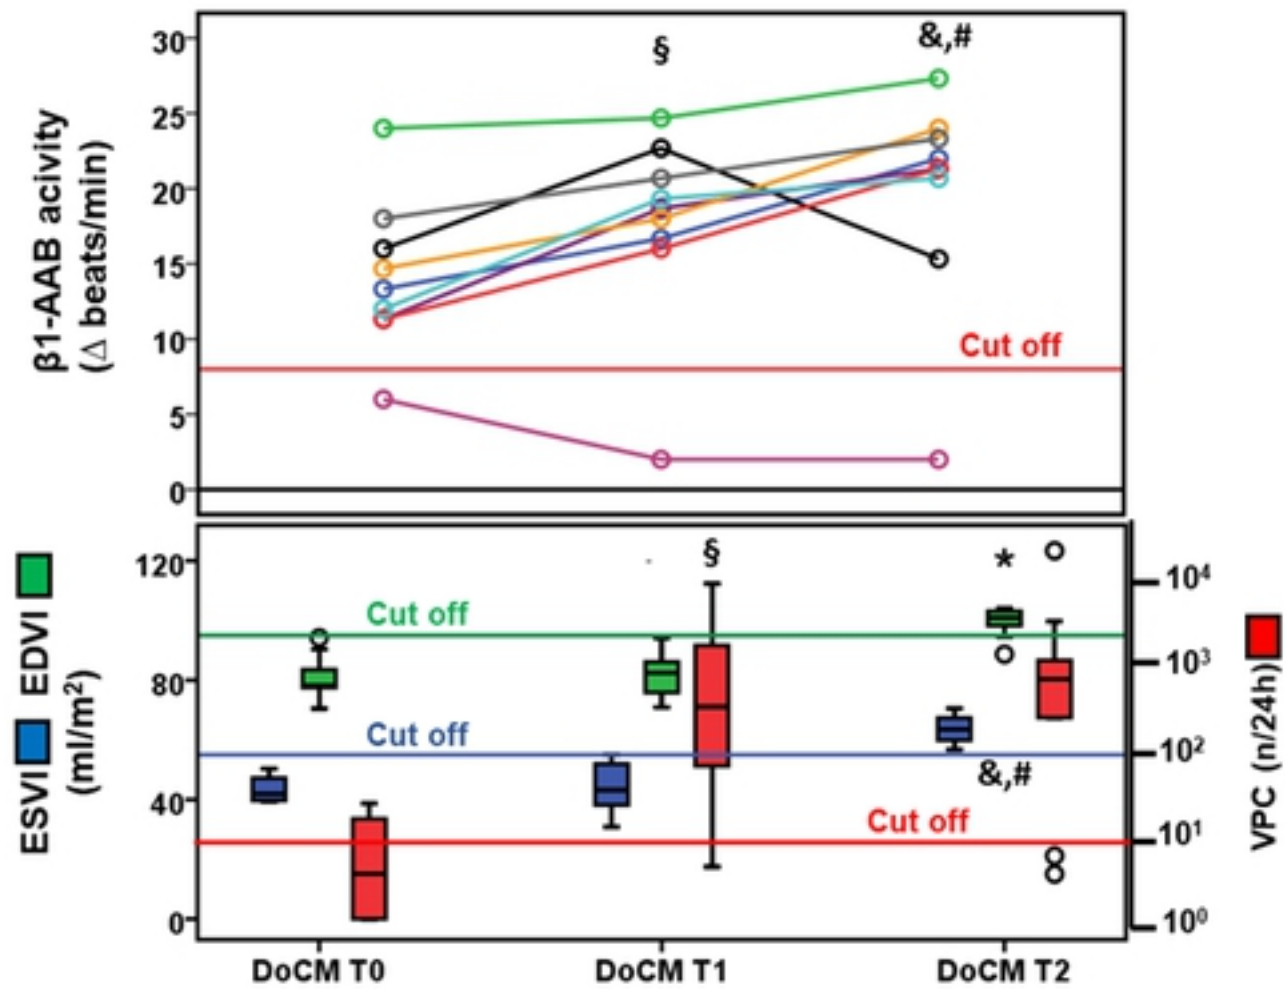

Figure 1

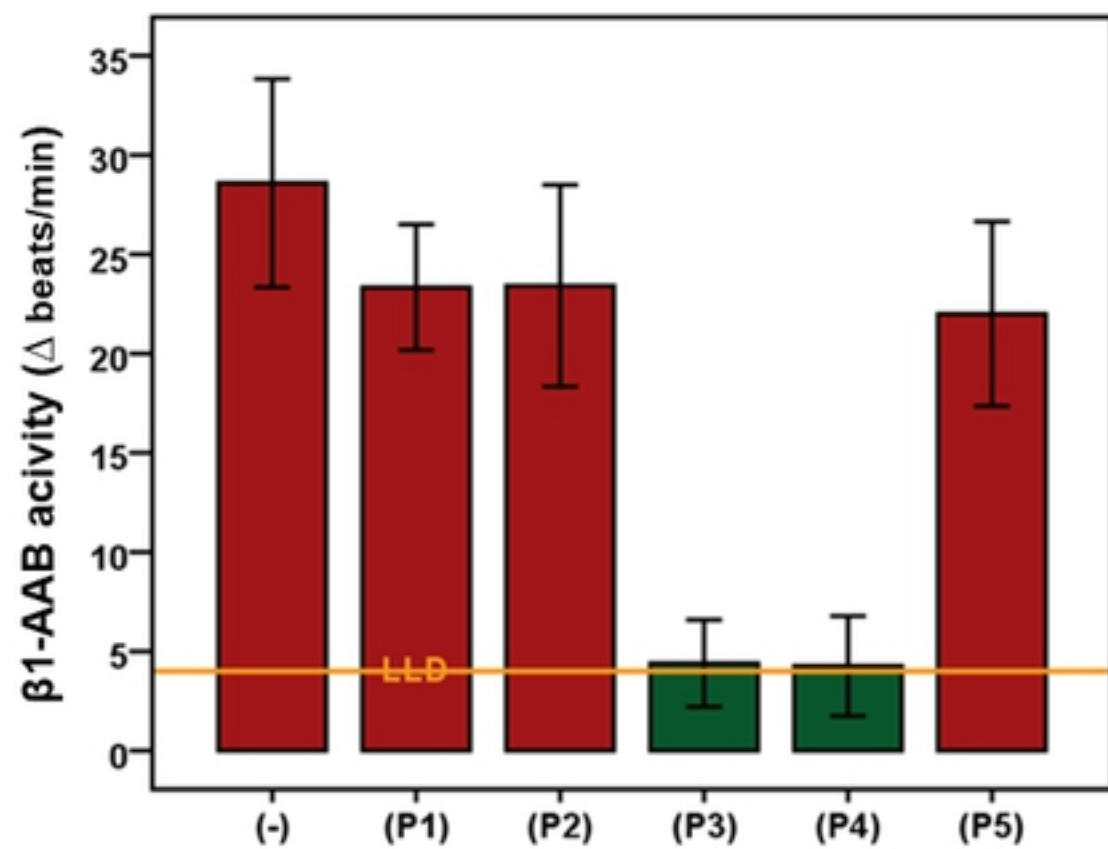

Figure 3

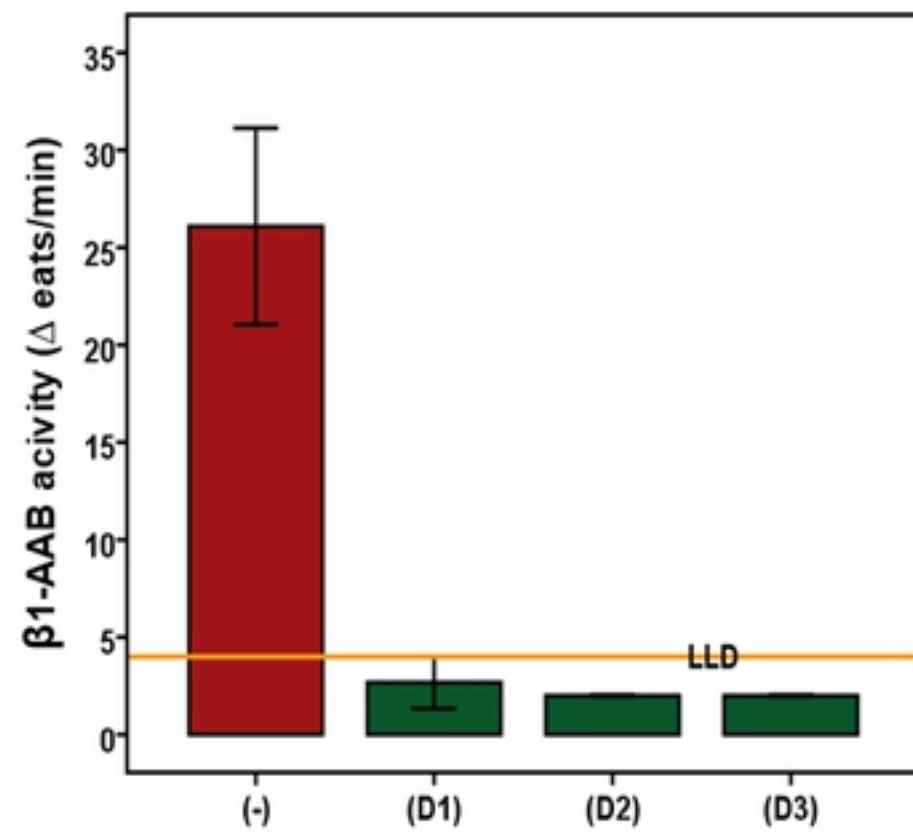

Figure 4

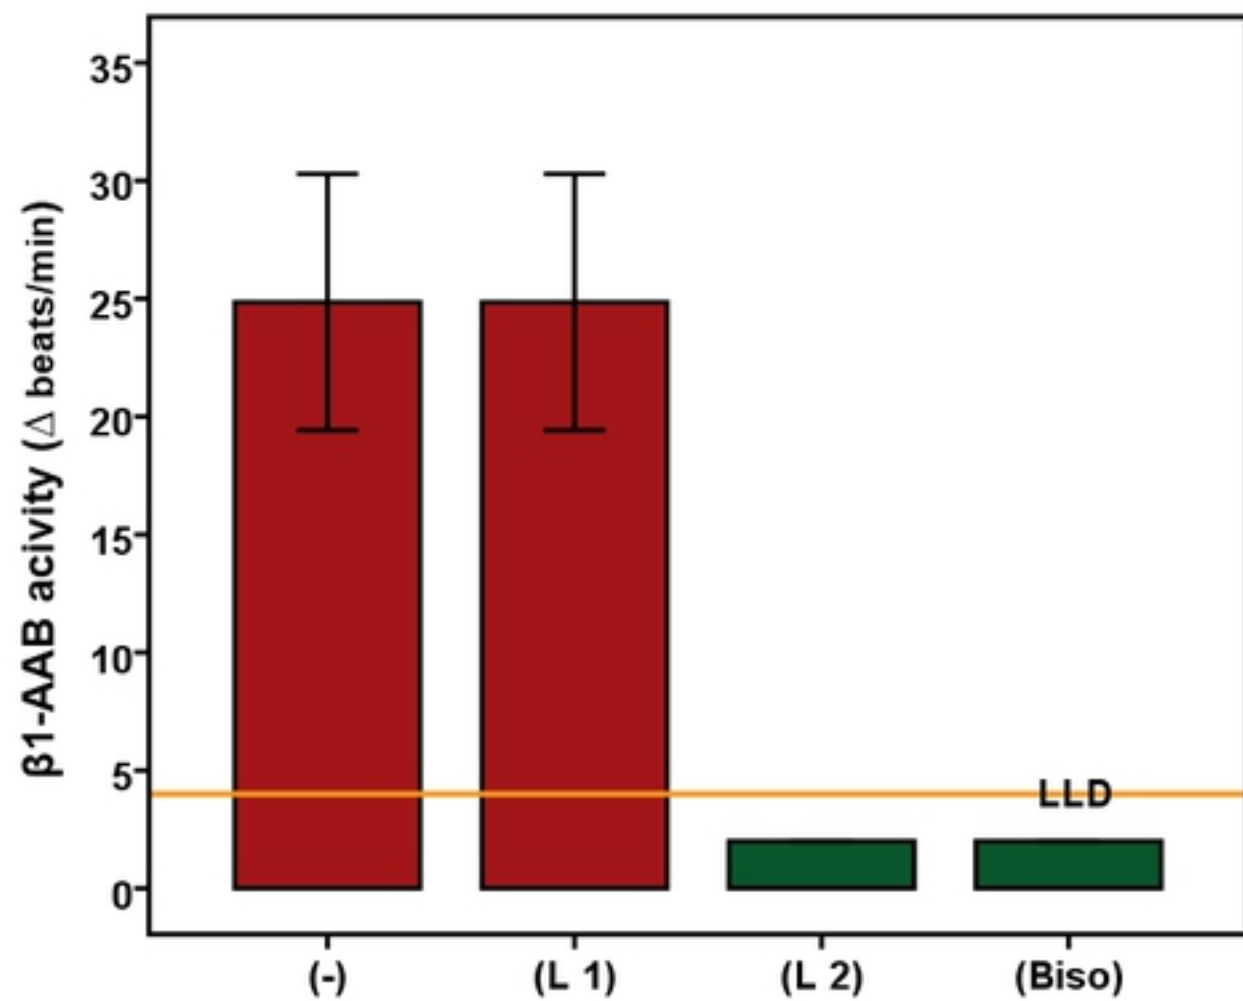

Figure 2
